# Supplementary material
Source: PubMed Central journal article supplement (PMC6662923)
Supplement: NIHMS1034816-supplement-Supplemental_File.pdf [file NIHMS1034816-supplement-Supplemental_File.pdf]

## Lateral Flow Assessment and Unanticipated Toxicity of Kratom

Lauren C. Smith, Lucy Lin, Candy S. Hwang,<sup>‡</sup> Bin Zhou, Diane M. Kubitz,<sup>†</sup> Huiying Wang<sup>§</sup>, and Kim D. Janda\*

Departments of Chemistry, Immunology and Microbial Science, Skaggs Institute for Chemical Biology and <sup>†</sup>Center for Antibody Development and Production; The Scripps Research Institute, La Jolla, CA, 92037 USA; <sup>§</sup>ABiox Company, 720 East First Street, Newberg, OR 97132, USA

### Table of Contents

|                                                                                                                       |     |
|-----------------------------------------------------------------------------------------------------------------------|-----|
| Figure S1. <sup>1</sup> H NMR spectrum of mitragynine .....                                                           | S2  |
| Figure S2. <sup>13</sup> C NMR spectrum of mitragynine .....                                                          | S3  |
| Figure S3. <sup>1</sup> H NMR spectrum of <b>2</b> .....                                                              | S4  |
| Figure S4. <sup>13</sup> C NMR spectrum of <b>2</b> .....                                                             | S5  |
| Figure S5. <sup>1</sup> H NMR spectrum of <b>3</b> .....                                                              | S6  |
| Figure S6. <sup>13</sup> C NMR spectrum of <b>3</b> .....                                                             | S7  |
| Figure S7. HPLC chromatogram and mass trace of Mit-hapten ( <b>4</b> ).....                                           | S8  |
| Figure S8. <sup>1</sup> H NMR spectrum of 7-hydroxymitragynine.....                                                   | S9  |
| Figure S9. <sup>13</sup> C NMR spectrum of 7-hydroxymitragynine .....                                                 | S10 |
| Figure S10. MALDI-TOF MS spectrum of unconjugated BSA.....                                                            | S11 |
| Figure S11. MS-ESI(+) spectrum of unconjugated BSA .....                                                              | S12 |
| Figure S12. MALDI-TOF MS spectrum of Mit-BSA .....                                                                    | S13 |
| Figure S13. MALDI-TOF MS spectrum of Mit-FliC.....                                                                    | S14 |
| Figure S14. Survival curve and LD <sub>50</sub> determination of mitragynine administered intravenously .....         | S15 |
| Figure S15. Survival curve and LD <sub>50</sub> determination of 7-hydroxymitragynine administered intravenously..... | S15 |
| Figure S16. Survival curve and LD <sub>50</sub> determination of heroin administered intravenously .....              | S15 |
| Figure S17. Survival curve and LD <sub>50</sub> determination of orally administered mitragynine .....                | S16 |
| Figure S18. Survival curve of orally administered 7-hydroxymitragynine .....                                          | S16 |
| Table S1. Hybridoma panel with midpoint titers and IC <sub>50</sub> value range.....                                  | S17 |
| Table S2. Competitive ELISA IC <sub>50</sub> values for select hybridomas.....                                        | S18 |
| Table S3. Post mortem urine mitragynine levels from several toxicology reports.....                                   | S18 |
| Figure S19. Image of lateral flow strip and peak measurement read-out from Leelu .....                                | S19 |
| Figure S20. Standard curve for 7-hydroxymitragynine and MIT29B7 strips in human urine ...                             | S19 |
| Table S4. Physiochemical properties of mitragynine .....                                                              | S20 |
| Table S5. Bioavailability properties of mitragynine and 7-hydroxymitragynine .....                                    | S21 |

Figure S1.  $^1\text{H}$  NMR spectrum of mitragynine

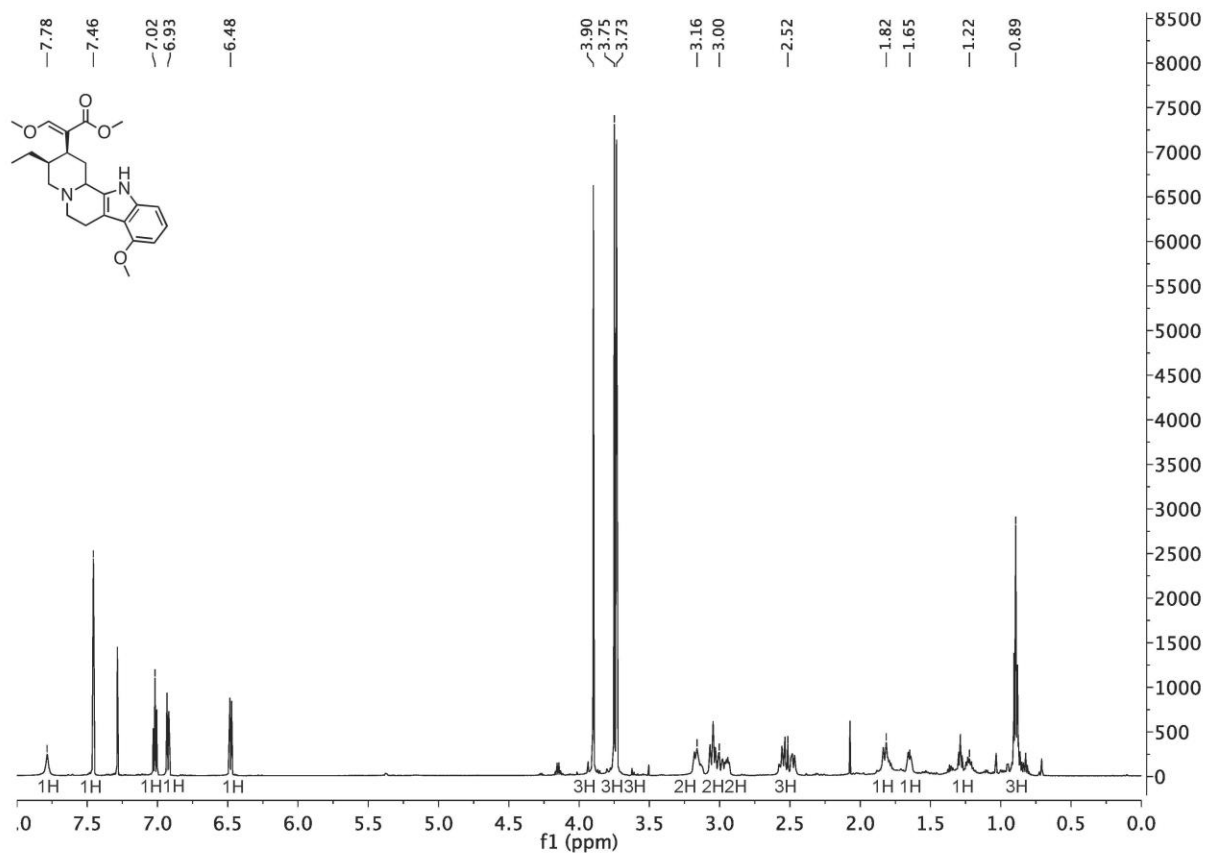

Figure S2.  $^{13}\text{C}$  NMR spectrum of mitragynine

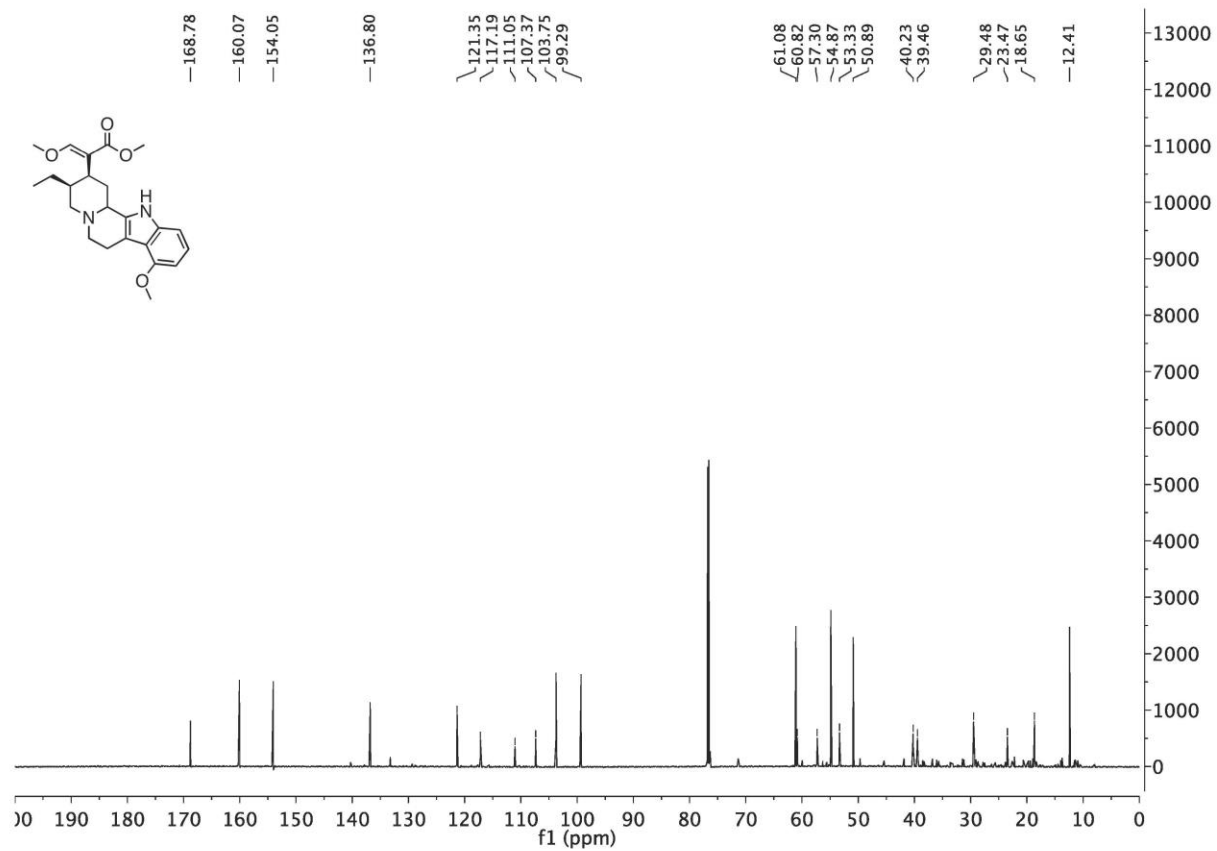

Figure S3.  $^1\text{H}$  NMR spectrum of **2**

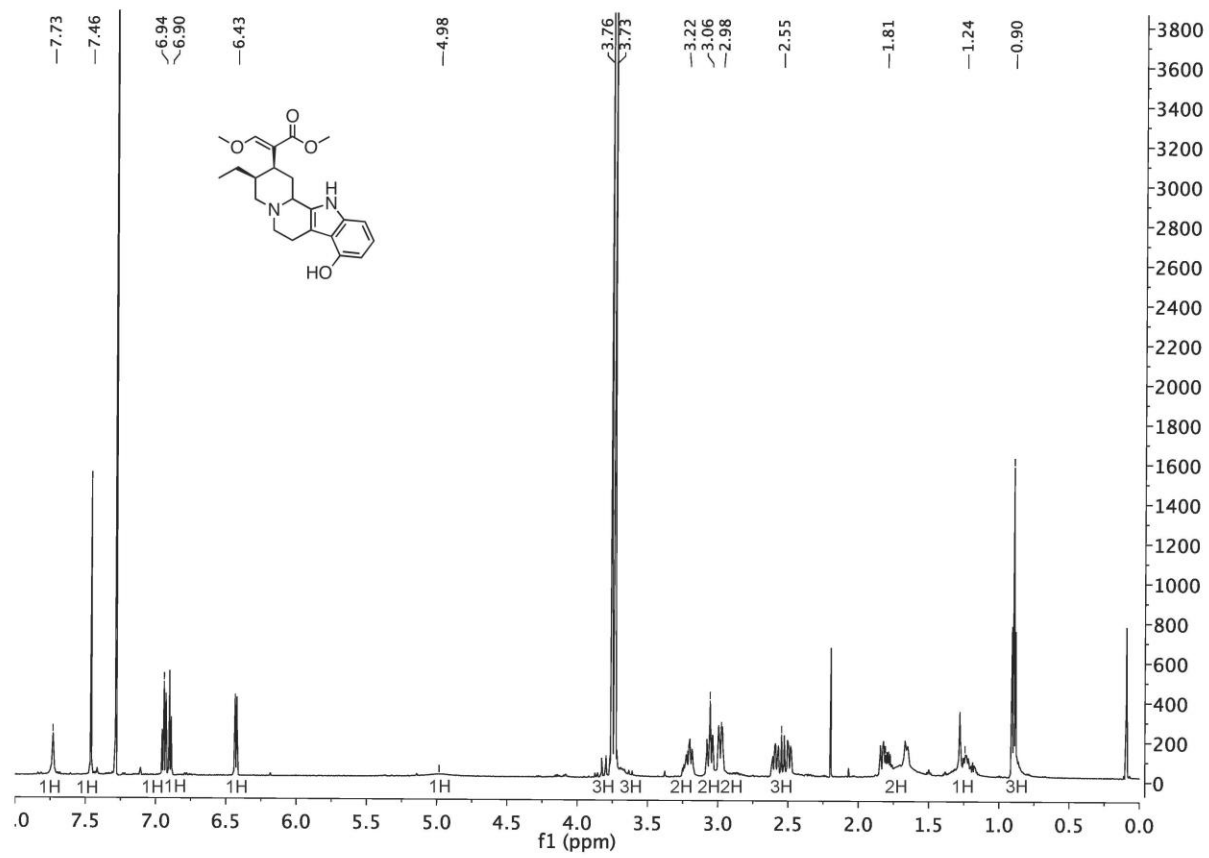

Figure S4.  $^{13}\text{C}$  NMR spectrum of **2**

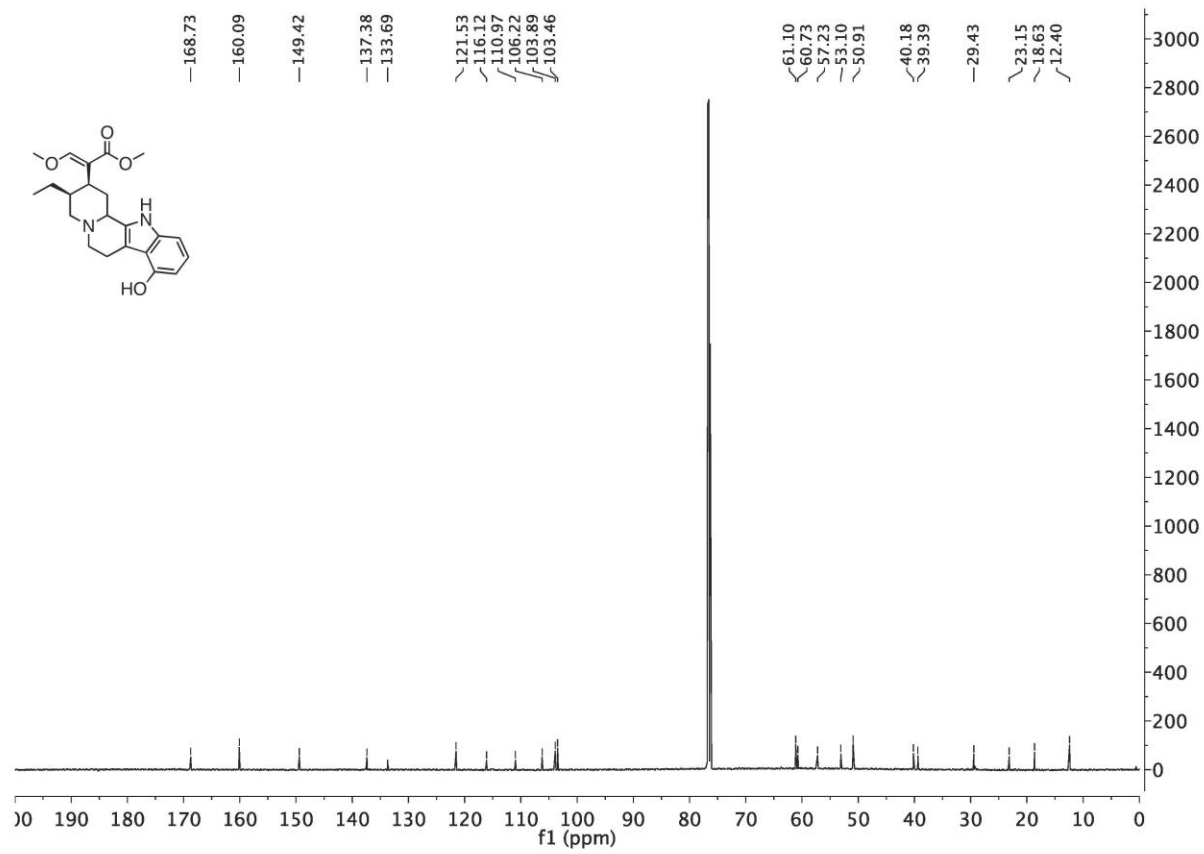

Figure S5.  $^1\text{H}$  NMR spectrum of **3**

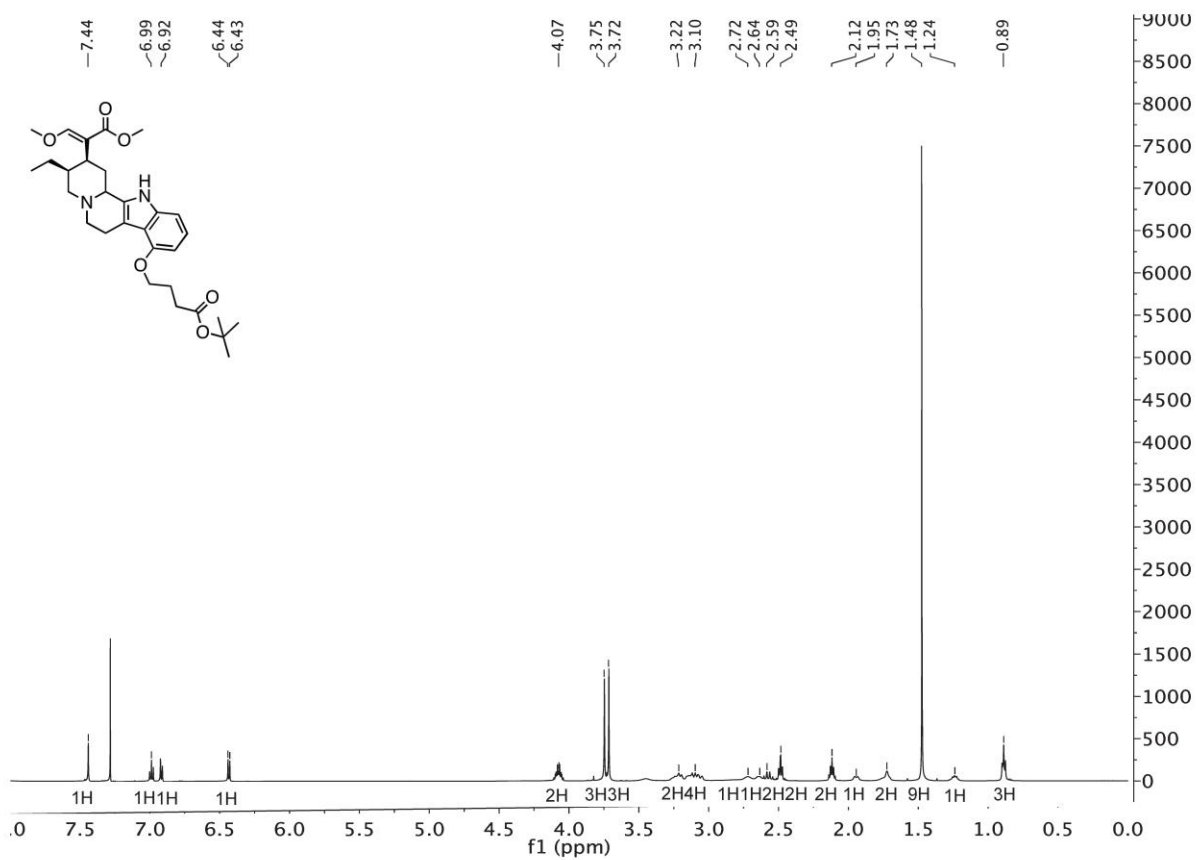

Figure S6.  $^{13}\text{C}$  NMR spectrum of **3**

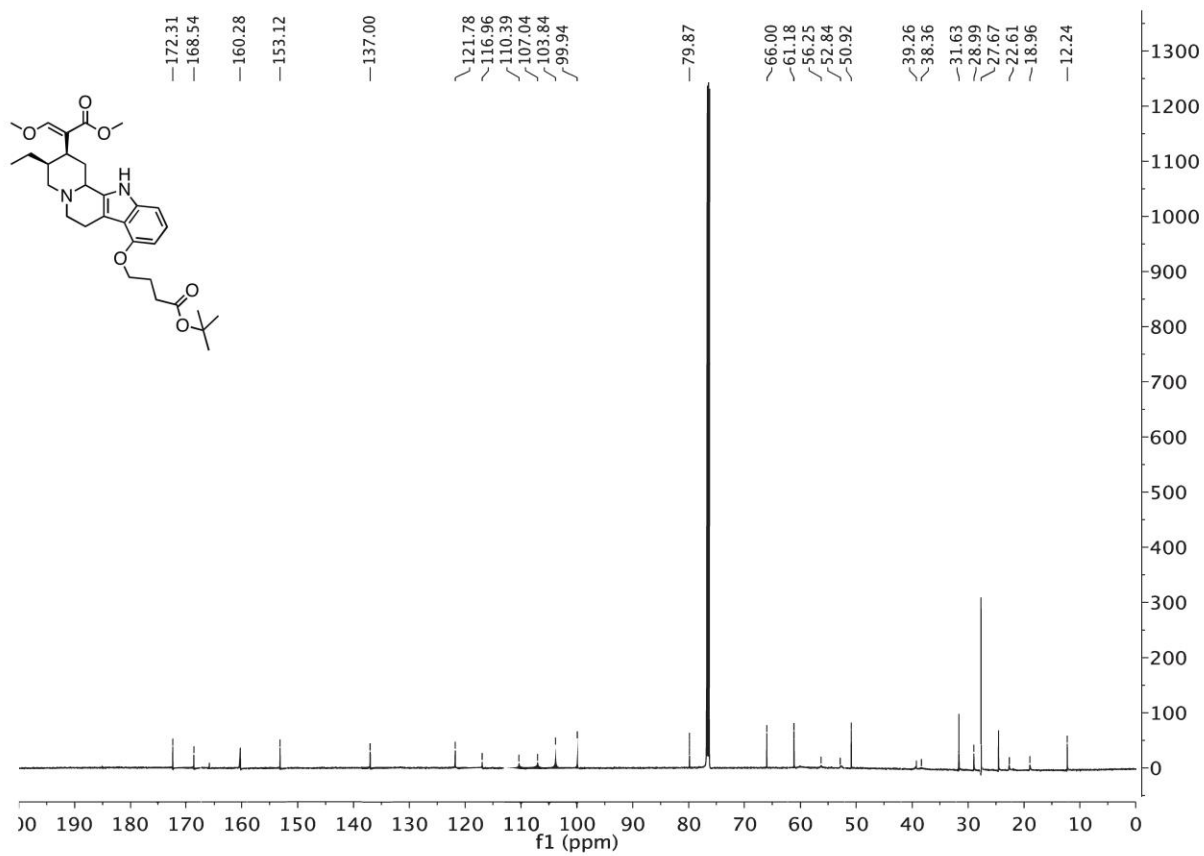

Figure S7. HPLC chromatogram and mass trace of Mit-hapten (4)

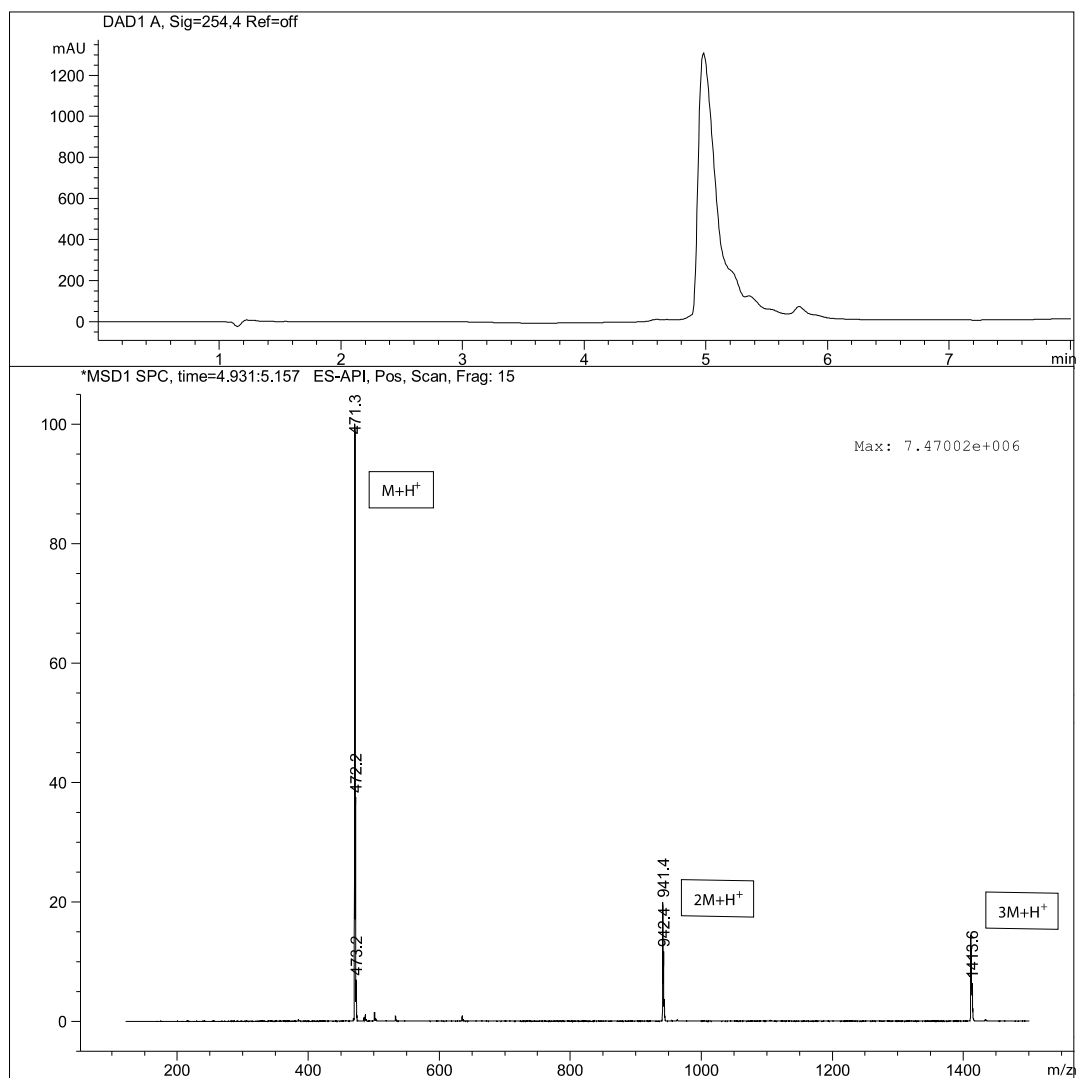



Figure S8. <sup>1</sup>H NMR spectrum of 7-hydroxymitragynine

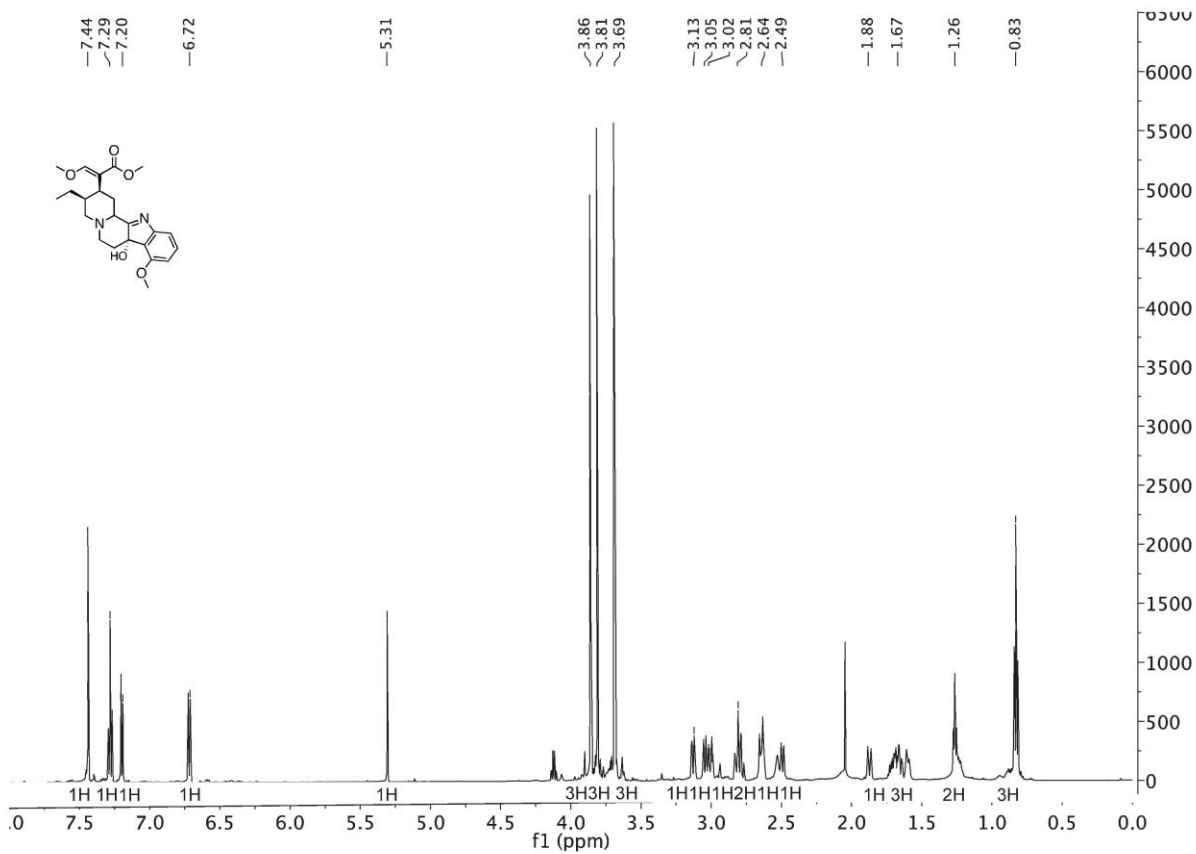

Figure S9.  $^{13}\text{C}$  NMR spectrum of 7-hydroxymitragynine

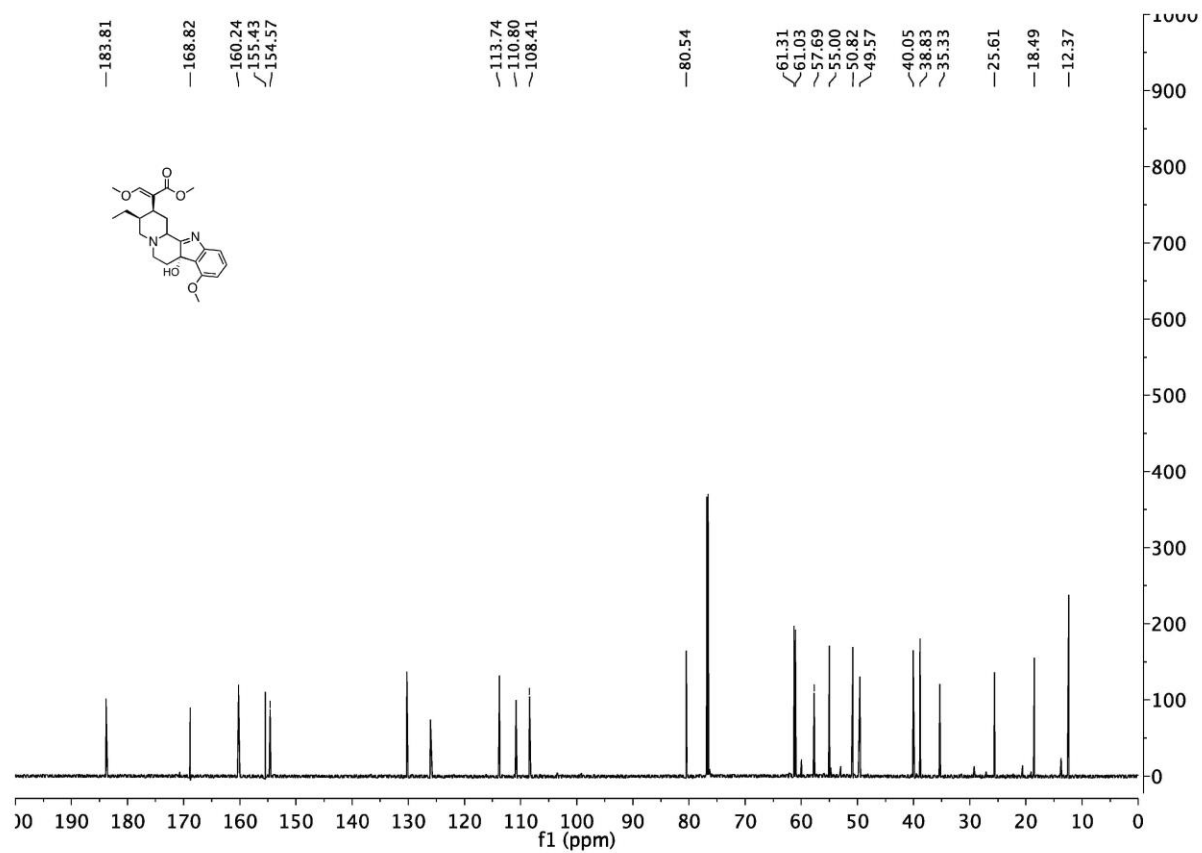

Figure S10. MALDI-TOF MS spectrum of unconjugated BSA

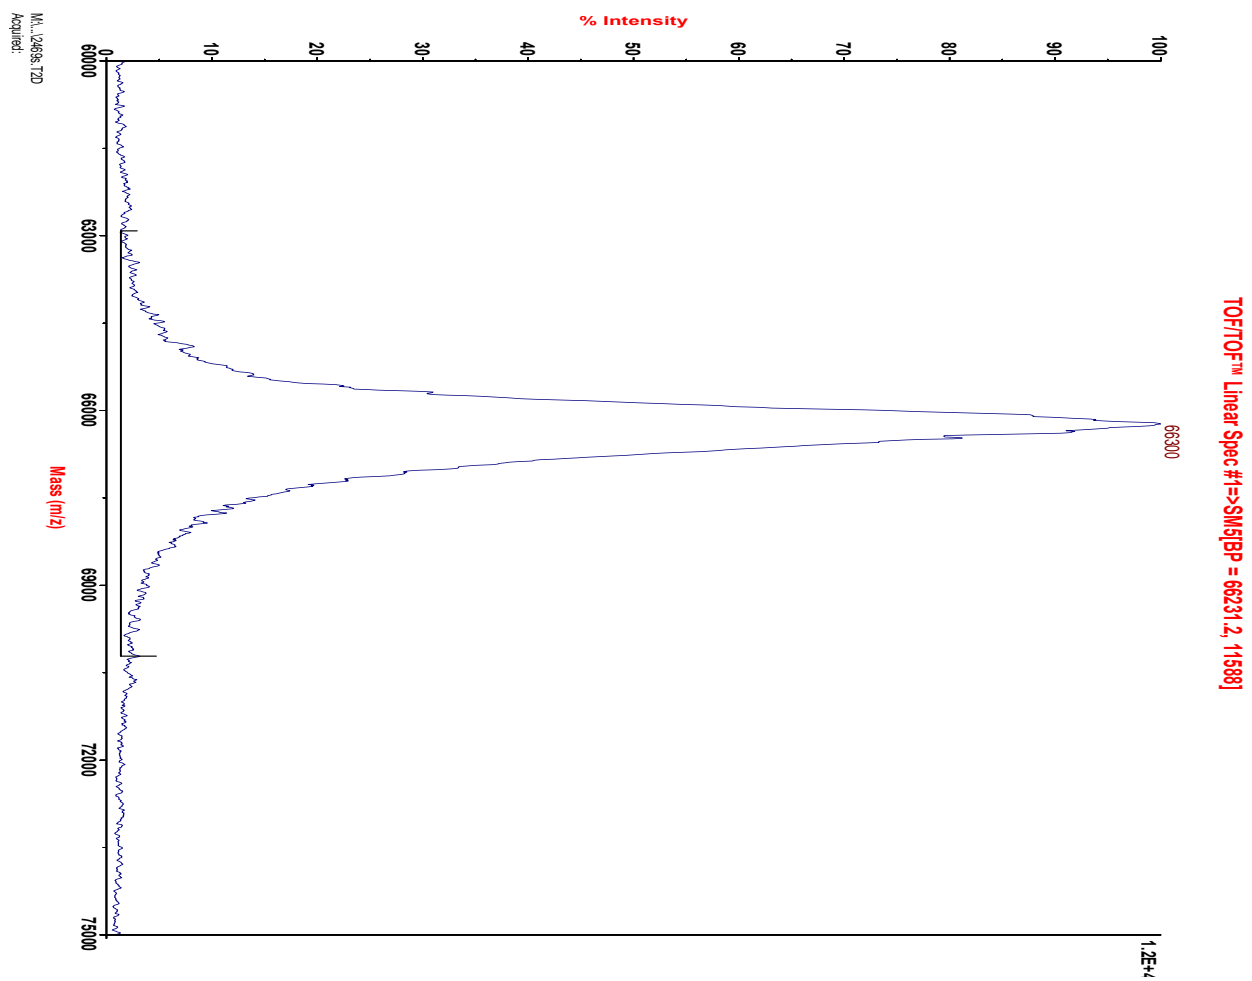

Figure S11. MS-ESI(+) spectrum of unconjugated BSA

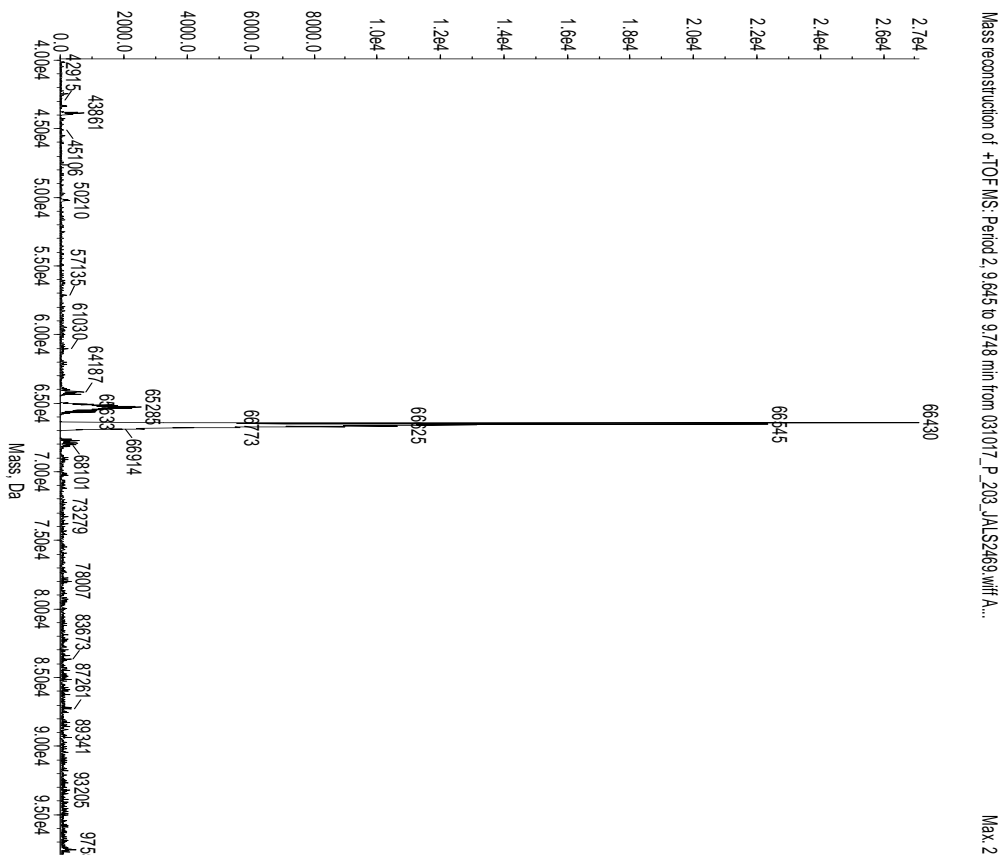

Figure S12. MALDI-TOF MS spectrum of Mit-BSA

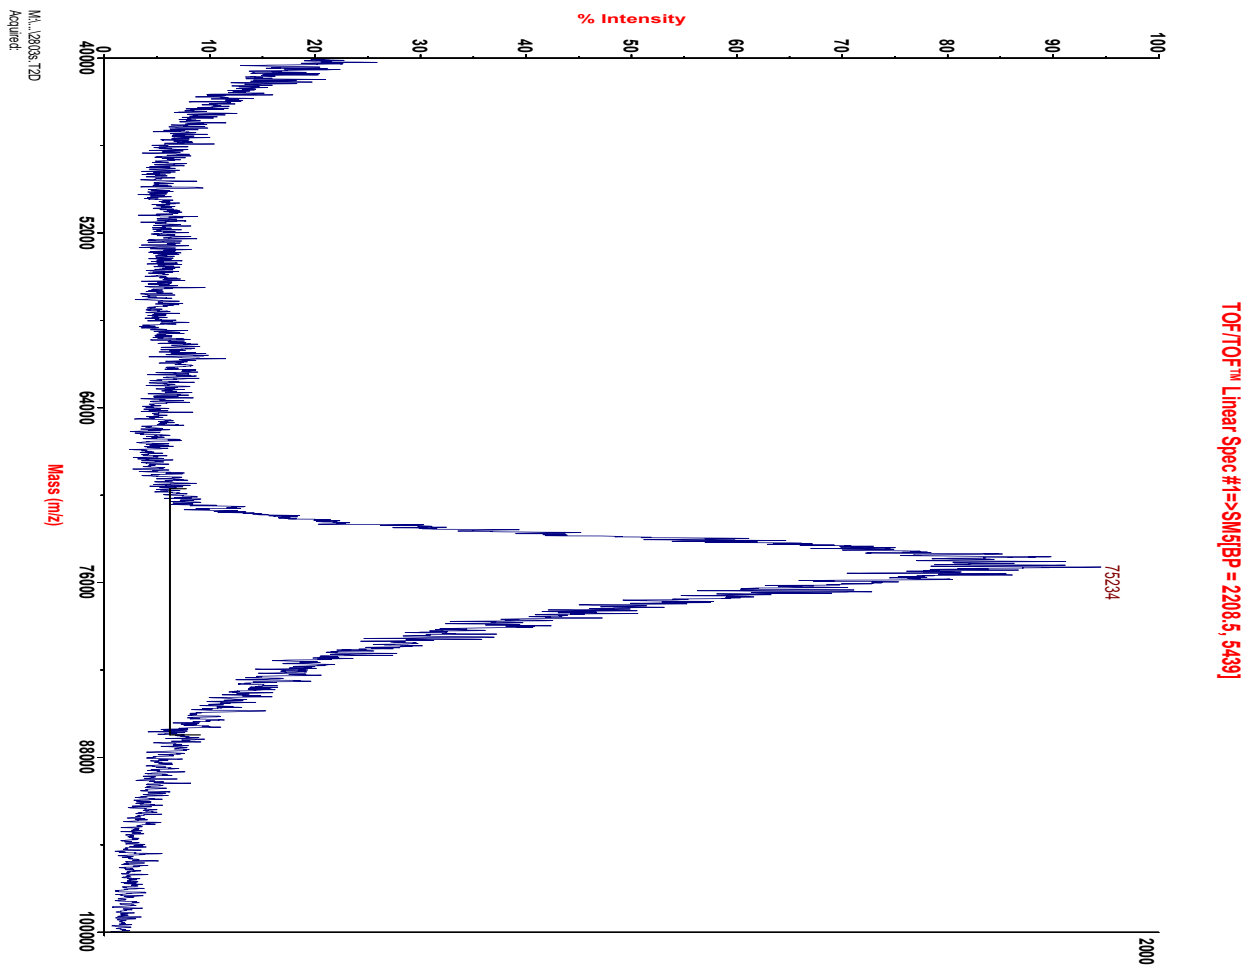

Figure S13. MALDI-TOF MS spectrum of Mit-FliC

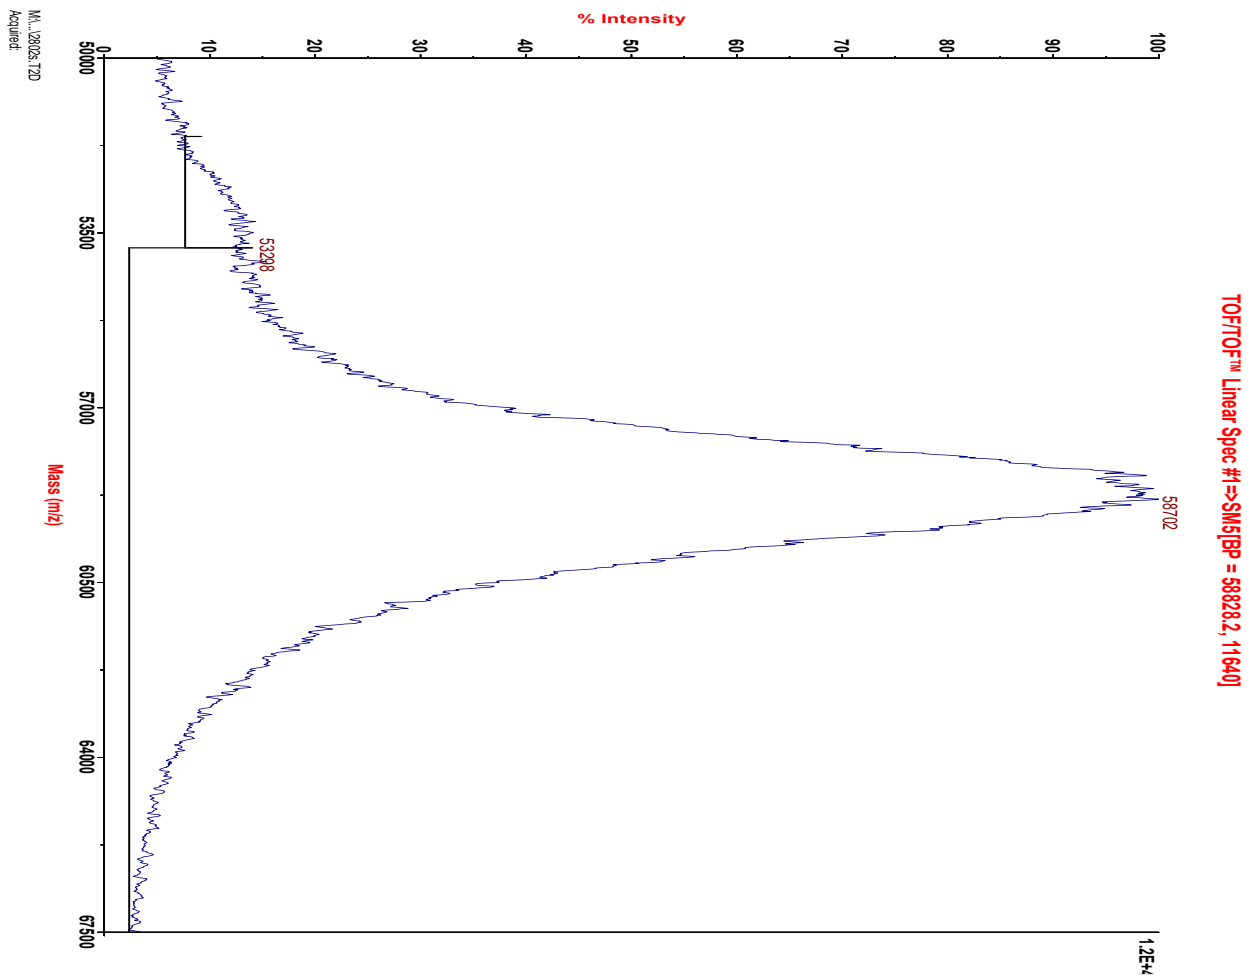

Figure S14. Survival curve and LD<sub>50</sub> determination of mitragynine administered intravenously

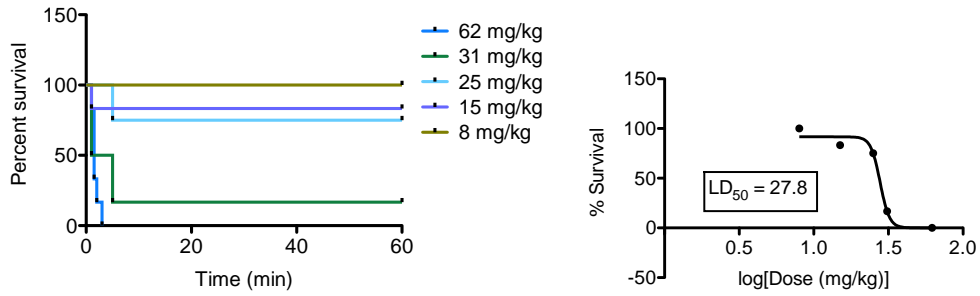

Figure S15. Survival curve and LD<sub>50</sub> determination of 7-hydroxymitragynine administered intravenously

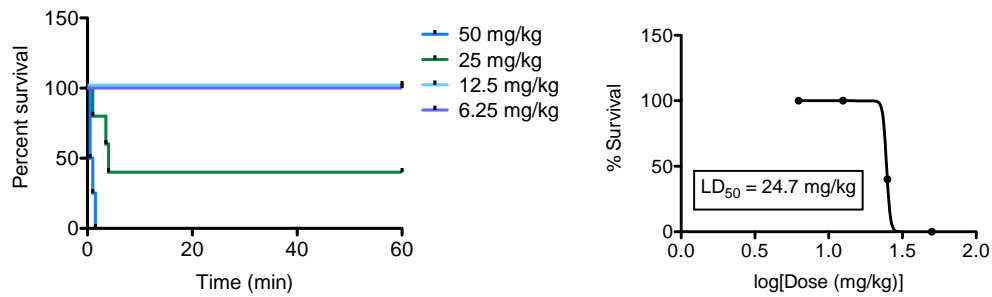

Figure S16. Survival curve and LD<sub>50</sub> determination of heroin administered intravenously

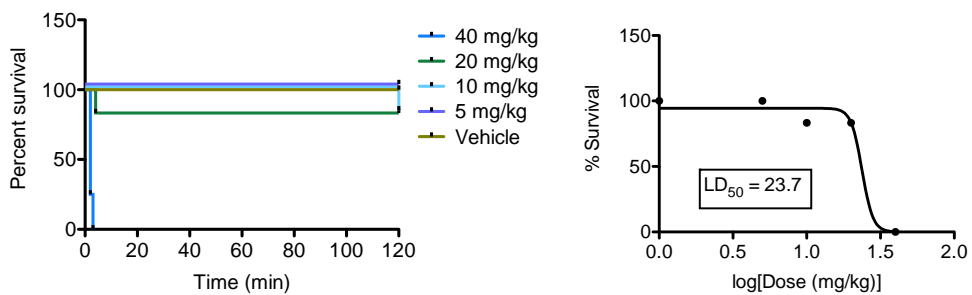

Figure S17. Survival curve and LD<sub>50</sub> determination of orally administered mitragynine

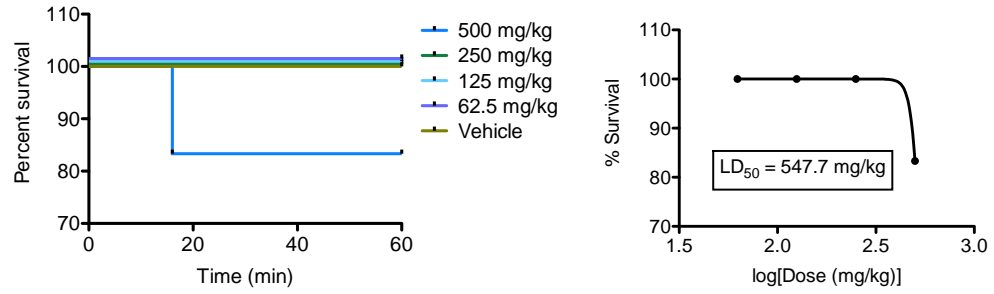

Figure S18. Survival curve of orally administered 7-hydroxymitragynine

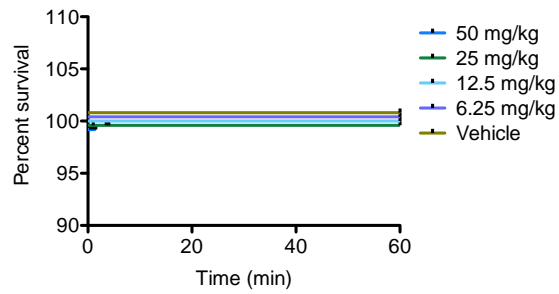



Table S1. Hybridoma panel with midpoint titers and IC<sub>50</sub> value range

| Entry | mAb   | Mit-BSA<br>Midpoint Titer | Mit Isotype | GaM<br>Midpoint Titer | GaM Isotype       | IC <sub>50</sub> (μM) |
|-------|-------|---------------------------|-------------|-----------------------|-------------------|-----------------------|
| 1     | 1F12  | 4-8                       | kg1         | 256                   | kg1               | 1-10                  |
| 2     | 7D12  | 512-1024                  | lg2b        | 256-512               | k, l, g1, g2b, g3 | 1-10                  |
| 3     | 11C2  | 1024-2048                 | lg2b        | 256-512               | k, l, g1, g2b     | 0.1-1                 |
| 4     | 13G12 | 256                       | kg1         | 256-512               | kg1               | ~ 1                   |
| 5     | 16A1  | 64-128                    | kg2a        | 64                    | kg2a              | 1-10                  |
| 6     | 16C7  | 256+                      | kg2a        | 256+                  | kg2a              | >>10                  |
| 7     | 17B7  | 64-128                    | kg2b        | 256+                  | kg1, 2b           | 0.1-1                 |
| 8     | 17E8  | 256+                      | kg2a        | 256                   | kg2a              | >>10                  |
| 9     | 17G7  | 256+                      | kg2a        | 128-256               | kg2a              | >>10                  |
| 10    | 17H11 | 256+                      | kg1         | 256+                  | kg1               | 1-10                  |
| 11    | 19A4  | 256+                      | kg2b        | 256+                  | kg2b              | >>10                  |
| 12    | 21B2  | 64                        | kg2a        | 64                    | kg2a, m           | >>10                  |
| 13    | 21F10 | 256+                      | kg1         | 64                    | kg1               | 1-10                  |
| 14    | 22D8  | 64                        | kg1         | 64                    | kg1               | >>10                  |
| 15    | 23A4  | 256+                      | kg1         | 256                   | kg1               | >>10                  |
| 16    | 23D7  | 128                       | kg1         | 128                   | kg1               | 1-10                  |
| 17    | 23D9  | 256+                      | kg2a        | 128                   | kg2a              | ~ 1                   |
| 18    | 24H7  | 128                       | kg2a        | 64                    | kg2a              | ~ 1                   |
| 19    | 24H8  | 256                       | kg1         | 256                   | kg1               | 1-10                  |
| 20    | 24H9  | 256+                      | kg1         | 128-256               | kg1               | >>10                  |
| 21    | 25A7  | 128                       | kg2a        | 32-64                 | kg2a              | ~ 1                   |
| 22    | 25G11 | 256+                      | kg1         | 256+                  | kg1               | ~ 1                   |
| 23    | 26B8  | 256+                      | kg2b        | 256+                  | kg2b              | >>10                  |
| 24    | 27H9  | 128                       | kg2a        | 64                    | kg2a              | 1-10                  |
| 25    | 28B6  | 256+                      | kg1         | 256+                  | kg1               | >>10                  |
| 26    | 28C12 | 256+                      | kg2a        | 128-256               | kg2a              | ~ 1                   |
| 27    | 28E1  | 256                       | kg1         | 128                   | kg1               | >>10                  |
| 28    | 28E9  | 128                       | kg1         | 64-128                | kg1               | ~ 1                   |
| 29    | 28F5  | 256+                      | kg1         | 256+                  | kg1               | >>10                  |
| 30    | 28G12 | 256+                      | kg2a        | 128                   | kg2a              | 1-10                  |
| 31    | 29B7  | 128-256                   | kg1         | 128-256               | kg1               | 0.1-1                 |
| 32    | 29F3  | 256+                      | lg1         | 256                   | lg1               | ~ 1                   |

GaM – Goat anti Mouse

Table S2. Competitive ELISA IC<sub>50</sub> values for select hybridomas

| mAb   | Urine IC <sub>50</sub> (µg/mL) | Buffer IC <sub>50</sub> (µg/mL) |
|-------|--------------------------------|---------------------------------|
| 11C2  | 0.037(±0.000)                  | 0.446(±0.251)                   |
| 17B7  | 1.45(±0.000)                   | 0.607(±0.321)                   |
| 29B7  | 3.28(±2.23)                    | 1.23(±0.000)                    |
| 13G12 | 0.376(±0.012)                  | 0.247(±0.021)                   |
| 23D9  | 1.50(±0.121)                   | 0.390(±0.006)                   |
| 24H7  | 0.186(±0.013)                  | 0.550(±484)                     |
| 25A7  | 2.22(±0.781)                   | 0.233(±0.133)                   |
| 25G11 | 6.17(±3.27)                    | 0.508(±0.000)                   |
| 28C12 | 0.852(±0.05)                   | 0.100(±0.002)                   |
| 28E9  | -                              | 0.569(±0.113)                   |
| 29F3  | 0.912(±0.043)                  | 0.098(±0.0004)                  |
| 17H11 | 0.997(±0.000)                  | 0.347(±0.028)                   |

Table S3. Post mortem urine mitragynine levels from several toxicology reports

| Urine Concentration (µg/mL) | Reference                                                                  |
|-----------------------------|----------------------------------------------------------------------------|
| 0.167                       | Nelsen, J. L., et al, <i>J Med Toxicol</i> <b>2010</b> , 6 (4), 424-6.     |
| 1.2                         | Holler, J. M., et al, <i>J Anal Toxicol</i> <b>2011</b> , 35 (1), 54-9.    |
| 3.47                        | Karinen, R., et al, <i>Forensic Sci Int</i> <b>2014</b> , 245, e29-32.     |
| 0.37                        | McIntyre, I. M., et al, <i>J Anal Toxicol</i> <b>2015</b> , 39 (2), 152-5. |
| >0.4                        | Domingo, O., et al, <i>Forensic Sci Int</i> <b>2017</b> , 271, e1-e7.      |

Figure S19. Image of lateral flow strip and peak measurement read-out from Leelu

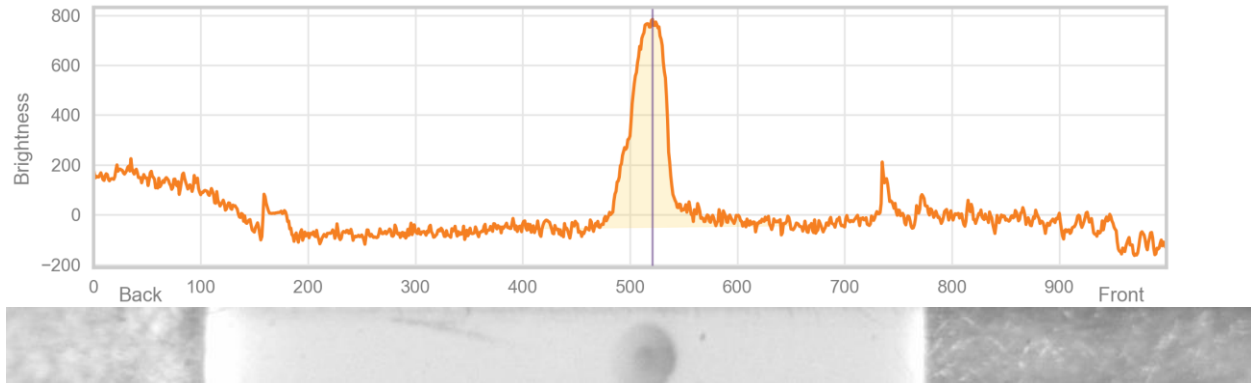

Figure S20. Standard curve for 7-hydroxymitragynine and MIT29B7 strips in human urine

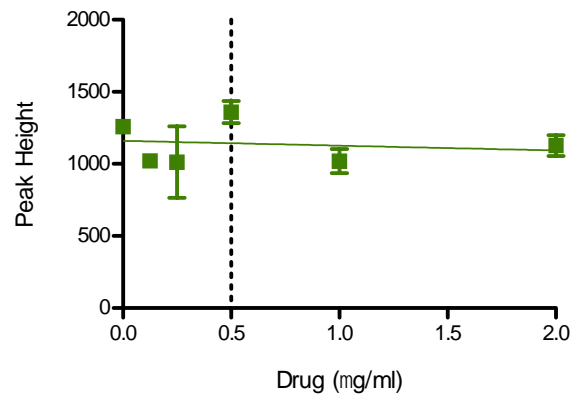

Table S4. Physicochemical properties of mitragynine

| Compound    | pKa              | Method                       | Source                                                                                                                                                                                                                       |
|-------------|------------------|------------------------------|------------------------------------------------------------------------------------------------------------------------------------------------------------------------------------------------------------------------------|
| Mitragynine | 8.11 ± 0.11      | UV Spectrophotometer         | Ramanathan, S.; et. al., Understanding the physicochemical properties of mitragynine, a principal alkaloid of <i>Mitragyna speciosa</i> , for preclinical evaluation. <i>Molecules</i> <b>2015</b> , <i>20</i> (3), 4915-27. |
| Mitragynine | 8.08 ± 0.04      | Microplate Spectrophotometer | Ramanathan, S.; et. al., Understanding the physicochemical properties of mitragynine, a principal alkaloid of <i>Mitragyna speciosa</i> , for preclinical evaluation. <i>Molecules</i> <b>2015</b> , <i>20</i> (3), 4915-27. |
| Compound    | Solubility       | Solvent                      | Source                                                                                                                                                                                                                       |
| Mitragynine | 88.9 ± 1.6 µg/ml | Buffer, pH 7                 | Ramanathan, S.; et. al., Understanding the physicochemical properties of mitragynine, a principal alkaloid of <i>Mitragyna speciosa</i> , for preclinical evaluation. <i>Molecules</i> <b>2015</b> , <i>20</i> (3), 4915-27. |
| Mitragynine | 64.6 ± 1.2 µg/ml | Water                        | Ramanathan, S.; et. al., Understanding the physicochemical properties of mitragynine, a principal alkaloid of <i>Mitragyna speciosa</i> , for preclinical evaluation. <i>Molecules</i> <b>2015</b> , <i>20</i> (3), 4915-27. |
| Compound    | logP             | logD                         | Source                                                                                                                                                                                                                       |
| Mitragynine | 1.70             | 0.78                         | Ramanathan, S.; et. al., Understanding the physicochemical properties of mitragynine, a principal alkaloid of <i>Mitragyna speciosa</i> , for preclinical evaluation. <i>Molecules</i> <b>2015</b> , <i>20</i> (3), 4915-27. |

Table S5. Bioavailability properties of mitragynine and 7-hydroxymitragynine

| Compound                          | Monolayer permeability (% Transport) | Cell type              | Source                                                                                                                                                                                                                                            |
|-----------------------------------|--------------------------------------|------------------------|---------------------------------------------------------------------------------------------------------------------------------------------------------------------------------------------------------------------------------------------------|
| Mitragynine (10 $\mu$ M)          | 11.4 $\pm$ 0.8                       | Caco-2                 | Manda, V. K.; et. al., Evaluation of in vitro absorption, distribution, metabolism, and excretion (ADME) properties of mitragynine, 7-hydroxymitragynine, and mitraphylline. <i>Planta Med</i> <b>2014</b> , <i>80</i> (7), 568-76.               |
| Mitragynine (10 $\mu$ M)          | 6.8 $\pm$ 0.6                        | MDR-MDCK               | Manda, V. K.; et. al., Evaluation of in vitro absorption, distribution, metabolism, and excretion (ADME) properties of mitragynine, 7-hydroxymitragynine, and mitraphylline. <i>Planta Med</i> <b>2014</b> , <i>80</i> (7), 568-76.               |
| 7-Hydroxymitragynine (10 $\mu$ M) | 7.8 $\pm$ 0.8                        | Caco-2                 | Manda, V. K.; et. al., Evaluation of in vitro absorption, distribution, metabolism, and excretion (ADME) properties of mitragynine, 7-hydroxymitragynine, and mitraphylline. <i>Planta Med</i> <b>2014</b> , <i>80</i> (7), 568-76.               |
| 7-Hydroxymitragynine (10 $\mu$ M) | 5.6 $\pm$ 0.9                        | MDR-MDCK               | Manda, V. K.; et. al., Evaluation of in vitro absorption, distribution, metabolism, and excretion (ADME) properties of mitragynine, 7-hydroxymitragynine, and mitraphylline. <i>Planta Med</i> <b>2014</b> , <i>80</i> (7), 568-76.               |
| Compound                          | Metabolism ( $t_{1/2}$ )             | Method                 | Source                                                                                                                                                                                                                                            |
| Mitragynine (1.5 mg/kg)           | 2.9 $\pm$ 2.1 hr                     | IV delivery in Rats    | Parthasarathy, S.; et. al., Determination of mitragynine in plasma with solid-phase extraction and rapid HPLC-UV analysis, and its application to a pharmacokinetic study in rat. <i>Anal Bioanal Chem</i> <b>2010</b> , <i>397</i> (5), 2023-30. |
| Mitragynine (50 mg/kg)            | 6.6 $\pm$ 1.3 hr                     | Oral delivery in Rats  | Parthasarathy, S.; et. al., Determination of mitragynine in plasma with solid-phase extraction and rapid HPLC-UV analysis, and its application to a pharmacokinetic study in rat. <i>Anal Bioanal Chem</i> <b>2010</b> , <i>397</i> (5), 2023-30. |
| 7-Hydroxymitragynine              | 24 min                               | Human liver microsomes | Manda, V. K.; et. al., Evaluation of in vitro absorption, distribution, metabolism, and excretion (ADME) properties of mitragynine, 7-hydroxymitragynine, and mitraphylline. <i>Planta Med</i> <b>2014</b> , <i>80</i> (7), 568-76.               |
| Compound                          | Stability in SGF (%RD)               | Incubation Time        | Source                                                                                                                                                                                                                                            |
| Mitragynine                       | -22.5%                               | 30                     | Ramanathan, S.; et. al., Understanding the physicochemical properties of mitragynine, a principal alkaloid of <i>Mitragyna speciosa</i> , for preclinical evaluation. <i>Molecules</i> <b>2015</b> , <i>20</i> (3), 4915-27.                      |
| Mitragynine                       | -8.9%                                | 30                     | Manda, V. K.; et. al., Evaluation of in vitro absorption, distribution, metabolism, and excretion (ADME) properties of mitragynine, 7-hydroxymitragynine, and mitraphylline. <i>Planta Med</i> <b>2014</b> , <i>80</i> (7), 568-76.               |
| 7-Hydroxymitragynine              | -7.6%                                | 30                     | Manda, V. K.; et. al., Evaluation of in vitro absorption, distribution, metabolism, and excretion (ADME) properties of mitragynine, 7-hydroxymitragynine, and mitraphylline. <i>Planta Med</i> <b>2014</b> , <i>80</i> (7), 568-76.               |
| Compound                          | Stability in SIF (%RD)               | Incubation Time        | Source                                                                                                                                                                                                                                            |
| Mitragynine                       | +4.43%                               | 30                     | Ramanathan, S.; et. al., Understanding the physicochemical properties of mitragynine, a principal alkaloid of <i>Mitragyna speciosa</i> , for preclinical evaluation. <i>Molecules</i> <b>2015</b> , <i>20</i> (3), 4915-27.                      |
| Mitragynine                       | -0.96%                               | 30                     | Manda, V. K.; et. al., Evaluation of in vitro absorption, distribution, metabolism, and excretion (ADME) properties of mitragynine, 7-hydroxymitragynine, and mitraphylline. <i>Planta Med</i> <b>2014</b> , <i>80</i> (7), 568-76.               |
| 7-Hydroxymitragynine              | -1.23%                               | 30                     | Manda, V. K.; et. al., Evaluation of in vitro absorption, distribution, metabolism, and excretion (ADME) properties of mitragynine, 7-hydroxymitragynine, and mitraphylline. <i>Planta Med</i> <b>2014</b> , <i>80</i> (7), 568-76.               |

| Compound                     | Plasma Protein Binding (% Free Drug Concentration) | P-glycoprotein inhibition (EC <sub>50</sub> ) | Source                                                                                                                                                                                                                              |
|------------------------------|----------------------------------------------------|-----------------------------------------------|-------------------------------------------------------------------------------------------------------------------------------------------------------------------------------------------------------------------------------------|
| Mitragynine (15 μM)          | 6.2 ± 1.3                                          | 18.2 ± 3.6 μM                                 | Manda, V. K.; et. al., Evaluation of in vitro absorption, distribution, metabolism, and excretion (ADME) properties of mitragynine, 7-hydroxymitragynine, and mitraphylline. <i>Planta Med</i> <b>2014</b> , <i>80</i> (7), 568-76. |
| 7-Hydroxymitragynine (15 μM) | 10.3 ± 1.5                                         | 32.4 ± 1.9 μM                                 | Manda, V. K.; et. al., Evaluation of in vitro absorption, distribution, metabolism, and excretion (ADME) properties of mitragynine, 7-hydroxymitragynine, and mitraphylline. <i>Planta Med</i> <b>2014</b> , <i>80</i> (7), 568-76. |
